# Supplementary material
Source: PubMed Central journal article supplement (PMC2934942)
Supplement: 00413.2010_2.pdf [file 00413.2010_2.pdf]

1 **Supplementary Figure 1: Representative microelectrode placements in the NA core and**  
2 **shell.** The circled region in the NA core histological image indicates the region where an  
3 electrical lesion was performed at the tip of a carbon fiber electrode. By comparison, the circled  
4 region in the NA shell histological image highlights the result of an electric lesion performed  
5 with a tungsten electrode.
