# Supplementary material
Source: PubMed Central journal article supplement (PMC2934942)

NA Core (A/P + 1.2mm)

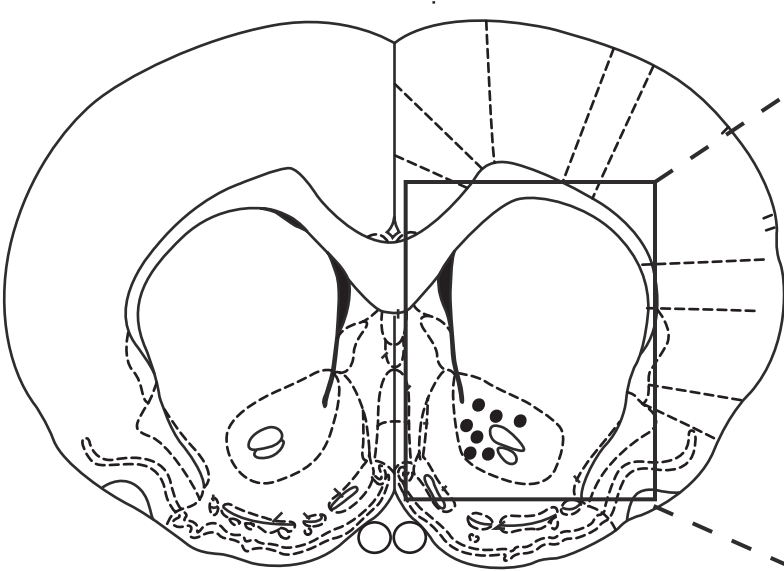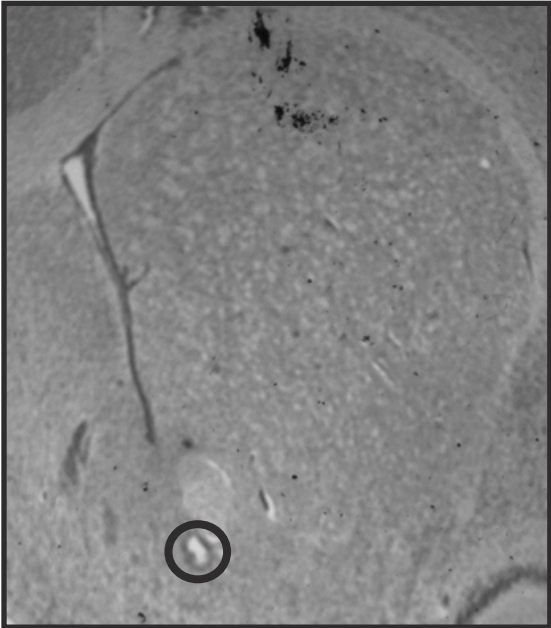

(carbon fiber lesion)

NA Shell (A/P + 1.7mm)

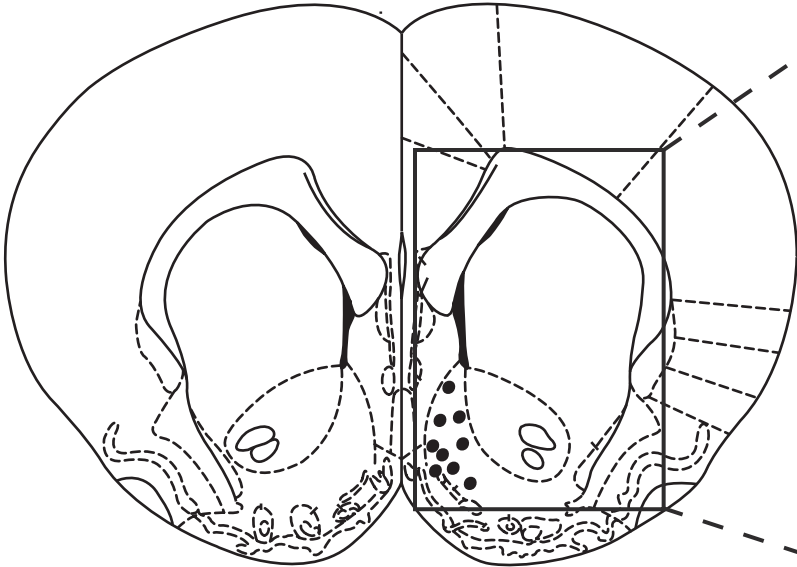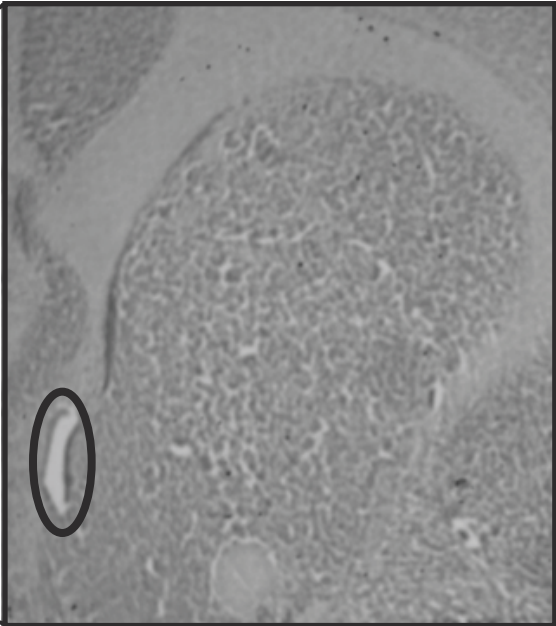

(tungsten lesion)

Supplement: 00413.2010_1.pdf [file 00413.2010_1.pdf]
